# Supplementary material for: SEMA6A/RhoA/YAP axis mediates tumor-stroma interactions and prevents response to dual BRAF/MEK inhibition in BRAF-mutant melanoma
Source: Springer Nature journal article supplement (doi:10.1186/s13046-022-02354-w), 2022-04-19
Supplement: MOESM1 [file 20324386]

## Supplementary Figure S1

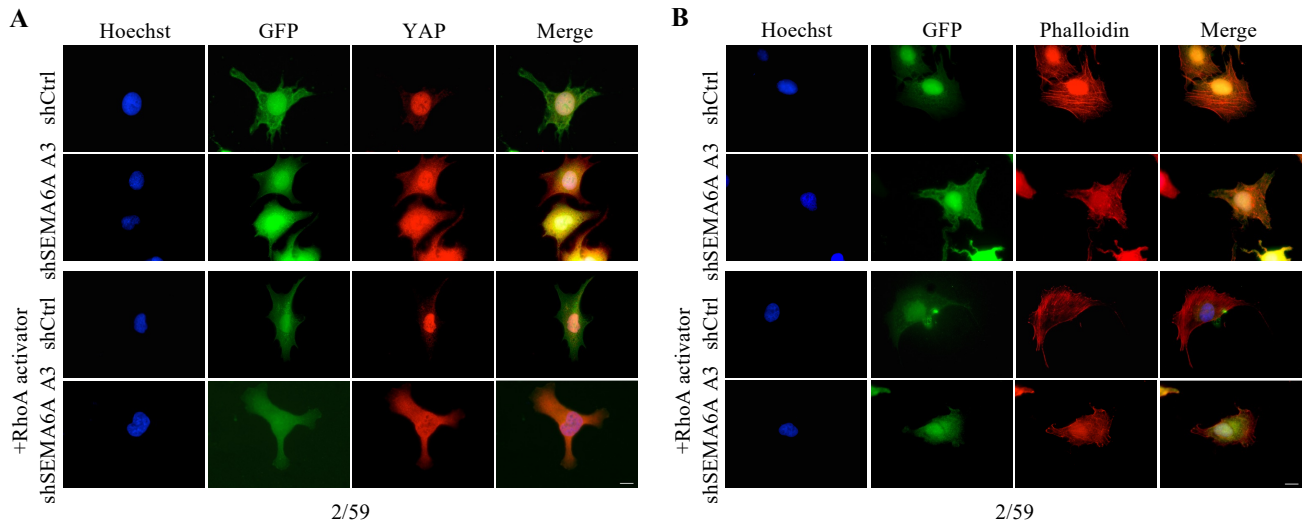

**A:** shCtrl and SEMA6A-depleted A3 cells plated on poly-l lysine coated slides were treated or not with RhoA activator and stained with anti-YAP (red signal) or **B:** with Phalloidin (red signal). GFP reporter gene expression revealed successful silencing induction. The cells were counterstained with Hoechst to highlight nuclei. Scale bar 10  $\mu$ m.

## Supplementary Figure S2

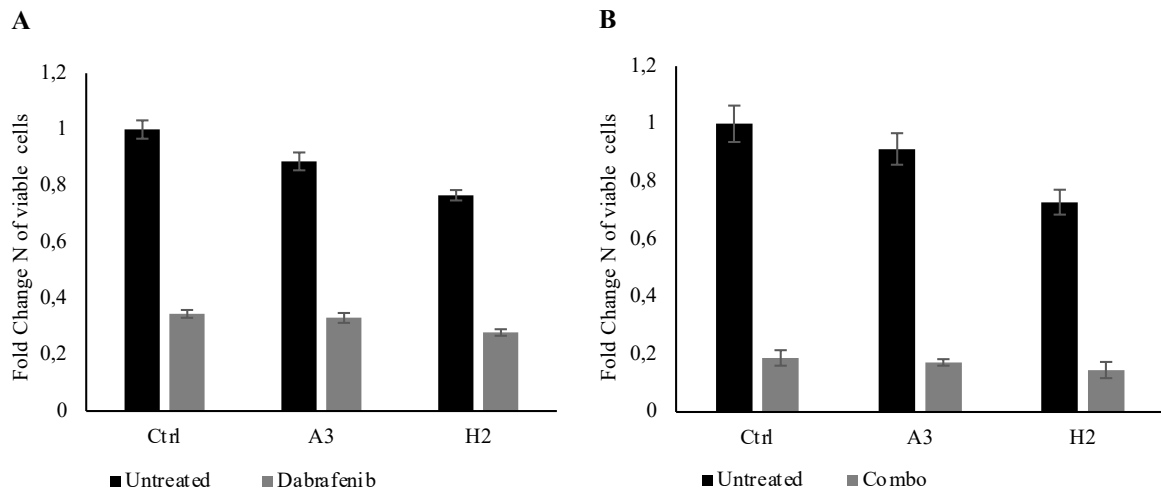

Fold change number of viable shCtrl and SEMA6A-depleted A3 and H2 cells untreated and treated for 48 hours with 0,1  $\mu$ M dabrafenib (A) and 0,1  $\mu$ M dabrafenib+5nM trametinib (B) as compared with untreated shCtrl 2/59 cells. **The results are presented as mean +/- standard deviation of three independent experiments.**
